# Supplementary material for: Characteristics and treatment patterns among US patients with hairy cell leukemia: a retrospective claims analysis
Source: Atypon-hosted journal article supplement (doi:10.2217/cer-2017-0014), 2017-05-09
Supplement: suppl_material.docx [file suppl_material.docx]

| **Appendix Table 1. Clinical characteristics at baseline and before therapy initiation.** | | | | | | |
| --- | --- | --- | --- | --- | --- | --- |
|  |  | **1L***  **(n=282)** | **1L****  **(n=282)** | **2L***  **(n=38)** | | **2L*****  **(n=38)** |
| **Characteristic** | |  |  | |  |
| **CCI score:** | |  |  | |  |  |
| mean | | 1 | 2.3 | | 1 | 2.7 |
| SD | | 1.1 | 0.9 | | 1.1 | 0.9 |
| median | | 0 | 2 | | 1 | 2 |
|  | | | | |  |  |
| **CCI score distribution: (%)** | | | | |  |  |
| 0 | | 50.4 | 2.8 | | 44.7 | 0.0 |
| 1 | | 11.7 | 0.7 | | 15.8 | 0.0 |
| 2 | | 29.4 | 68.1 | | 34.2 | 52.6 |
| 3+ | | 8.5 | 28.4 | | 5.3 | 47.4 |
|  | |  |  | |  |  |
| **Frequent (>10%) relevant comorbidities of interest: (%)** | | | | | |  |
| Abdominal pain | | 13.5 | 15.2 | | 10.5 | 10.5 |
| Adenopathy | | 5.7 | 9.6 | | 2.6 | 10.5 |
| Anemia | | 31.2 | 39.7 | | 18.4 | 42.1 |
| Aplastic anemia | | 35.8 | 49.6 | | 18.4 | 39.5 |
| Diabetes | | 11.0 | 10.6 | | 13.2 | 13.2 |
| Fatigue | | 19.5 | 21.3 | | 15.8 | 13.2 |
| Hypertension | | 26.2 | 30.9 | | 28.9 | 28.9 |
| Mild liver disease | | 2.8 | 6.4 | | 0.0 | 15.8 |
| AMI | | 7.1 | 7.8 | | 7.9 | 13.2 |
| Splenomegaly | | 20.9 | 37.2 | | 18.4 | 34.2 |
|  | |  |  | |  |  |
| **All-cause healthcare costs:** | | | | | | |
| mean | | $6,635 | $16,018 | | $4,370 | $35,623 |
| SD | | $7,246 | $17,172 | | $4,429 | $32,989 |
| median | | $4,627 | $10,173 | | $2,590 | $30,205 |
| *Measured in the 6-months prior to the diagnosis date.  **Measured in the 6-months prior to 1L therapy initiation.  ***Measured in the 6-months prior to 2L therapy initiation.  1L: First line; 2L: Second line; AMI: Acute myocardial infarction; CCI: Charlson Comorbidity Index; Hem/Onc: Hematology/Oncology; Primary: General Practitioner/Family Medicine/Internal Medicine. | | | | | | |

**Appendix Figure 1. 2L treatment pathways for 1L cladribine patients by year of 1L cladribine initiation.**


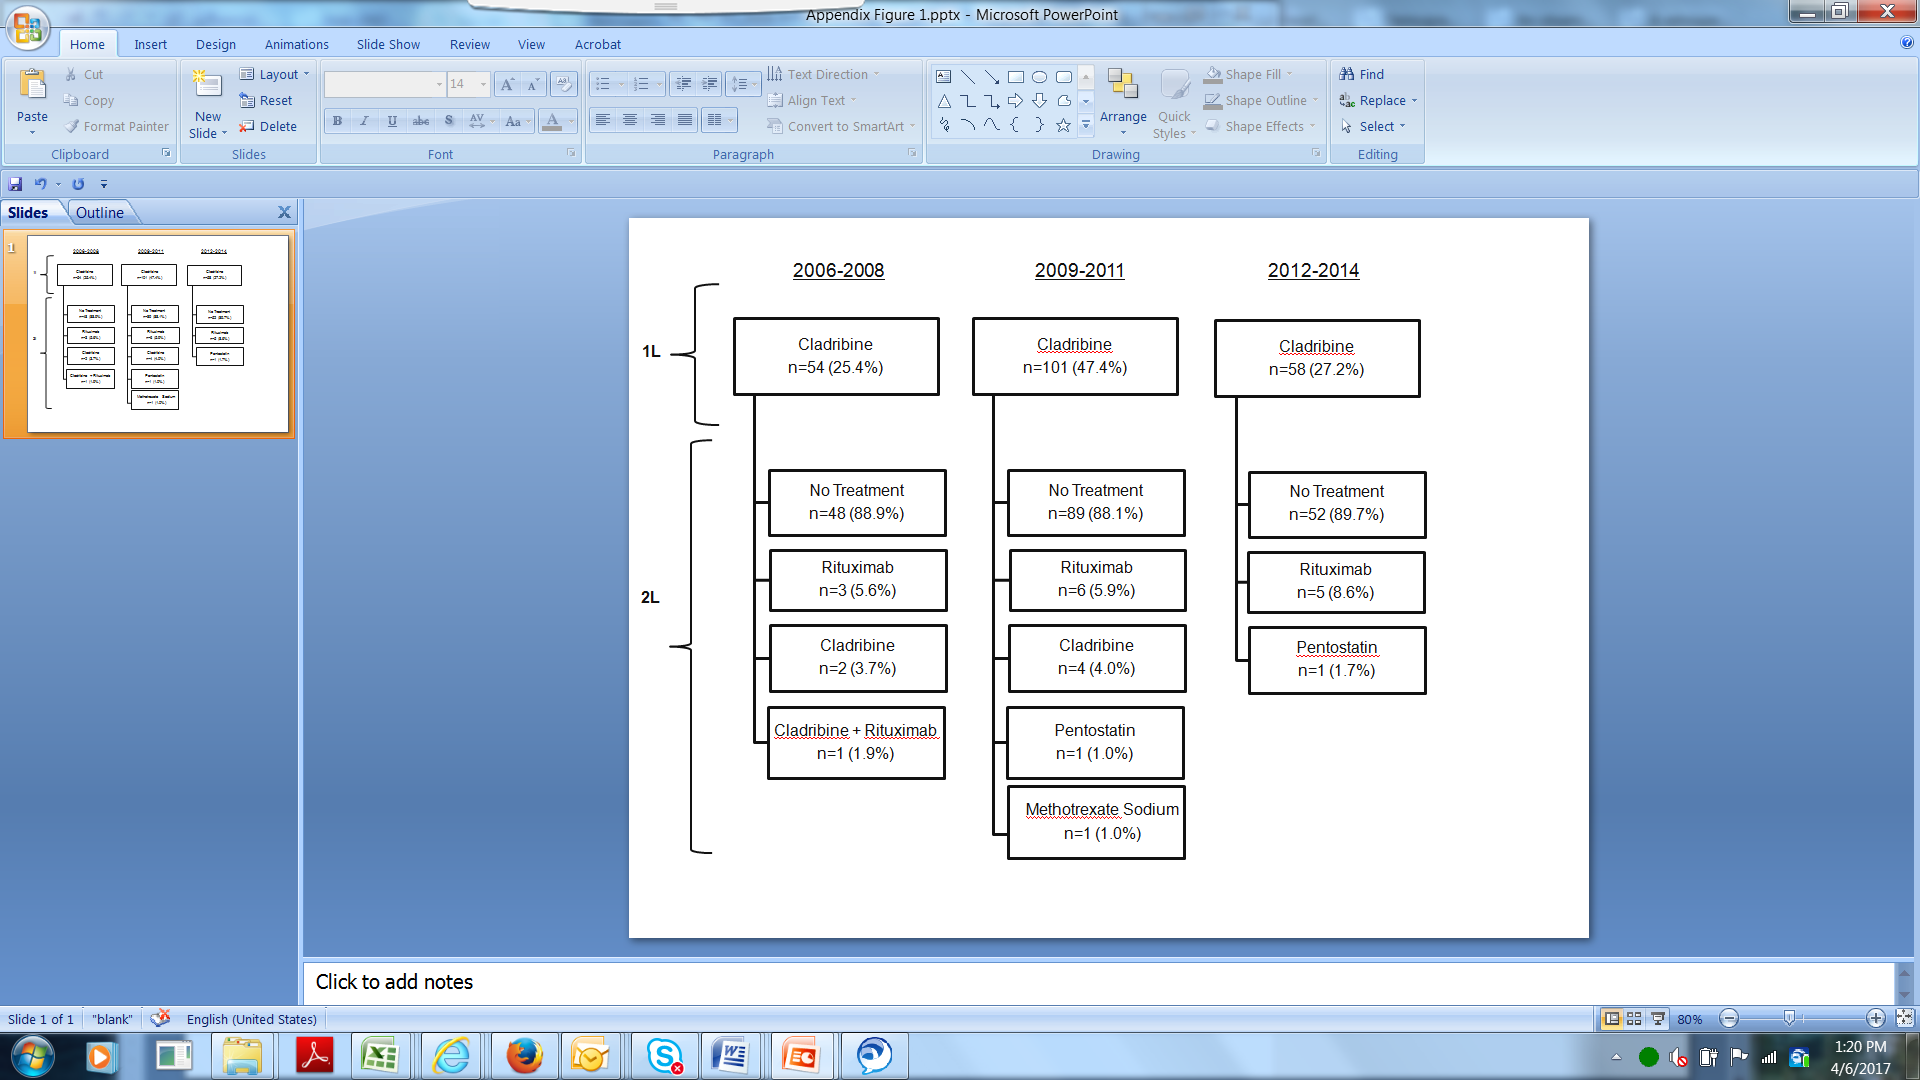


| **Appendix Table 2. Line of therapy characteristics.** | | | |
| --- | --- | --- | --- |
|  | **All Patients** | | |
|  | **(N=749)** | | |
| **Measure** | **Mean** | **SD** | **Median** |
| **Proportion of patients initiating 1L therapy (n,%)** | 282 | 37.7% |  |
| Time from index date to 1L therapy initiation (months) | 4.4 | 9.8 | 1 |
| Time from 1L therapy initiation to end of follow-up (months) | 29.5 | 21.0 | 23 |
| 1L therapy duration (days) | 34.1 | 104.4 | 5 |
|  |  |  |  |
| 1L cladribine (n,%) | 213 | 75.5% |  |
| 1L cladribine duration (days) | 7.3 | 16.2 | 5 |
| 1L cladribine administration days | 3.4 | 3.0 | 2 |
|  |  |  |  |
| **Proportion of patients initiating 2L therapy (n,%)** | 38 | 5.1% |  |
| Time from index date to 2L therapy initiation (months) | 16.0 | 16.7 | 8.0 |
| Time from 2L therapy initiation to end of follow-up (months) | 23.9 | 19.6 | 17 |
| 2L therapy duration (days) | 53.7 | 70.9 | 28 |
|  |  |  |  |
| 2L rituximab (n,%) | 213 | 52.6% |  |
| 2L rituximab duration (days) | 69.4 | 78.0 | 50 |
| 2L rituximab administration days | 4.9 | 2.1 | 4 |
| 1L: First line; 2L: Second line. | |  |  |
